# Supplementary material for: Non-invasive nomogram to predict EGFR/TP53 co-mutation for early-stage lung adenocarcinomas manifesting as ground-glass nodules
Source: Research Square preprint supplement (doi:10.21203/rs.3.rs-7352516/v1), 2025-09-23
Supplement: Supplementary file 1 [file 7133b614a5b6f70c139b976c.docx]

**Table S1** Multivariable logistic analyses of thirty-seven potential predictors

| Intercept and variable | Prediction model | | |  |
| --- | --- | --- | --- | --- |
|  | β | Std.Error | Z-Value | P-Value |
| Intercept | -5.0755 | 1.1463 | -4.428 | ＜0.001*** |
| Cough | -0.1109 | 0.9555 | -0.116 | 0.90764 |
| Expectoration | 1.8165 | 1.0896 | 1.667 | 0.09549 * |
| Gender | 0.4324 | 0.5525 | 0.783 | 0.43386 |
| Diabetes mellitus | -15.101 | 1613.2938 | -0.009 | 0.99253 |
| Smoking duration | 0.4883 | 0.3171 | 1.540 | 0.12362 |
| Cancer family | 0.2205 | 0.6333 | 0.348 | 0.72775 |
| Cancer history | 2.9006 | 0.6695 | 4.333 | ＜0.001*** |
| Multiple nodules | -0.5696 | 0.5267 | -1.081 | 0.27950 |
| Diameter | -0.7993 | 0.4835 | -1.653 | 0.09832 * |
| Density | 1.2937 | 0.9819 | 1.317 | 0.18768 |
| Lobulation sign | 1.5386 | 0.5920 | 2.599 | 0.00935** |
| Vascular convergence sign | 3.3981 | 0.7371 | 4.610 | ＜0.001*** |
| Location | -0.2659 | 0.2061 | -1.290 | 0.19709 |
| TNM stage | 0.7961 | 0.2894 | 2.751 | 0.00594 ** |

Signif. codes: P＜0.001 ***，P＜0.01 **, P＜0.1 *.

**Table S2** A novel scoring system developed from a nomogram of the training cohort.

| Variable | Scores | |
| --- | --- | --- |
|  | Yes | No |
| Expectoration (No) | 55 | 0 |
| Cancer family (Yes) | 85 | 0 |
| Diameter (≥10mm) | 0~24 | 47 |
| Lobulation sign (Yes) | 47 | 0 |
| Vascular convergence sign (Yes) | 88 | 0 |
| TNM stage (IV) | 100 | 0 |
